# Supplementary material for: Amplified circularly polarized luminescence of chiral lanthanide-based chains through helical assembly
Source: Royal Society of Chemistry journal article supplement (doi:10.1039/d4ce00957f), 2024-01-01
Supplement: d4ce00957f1.pdf [file d4ce00957f1.pdf]

## Electronic Supplementary Information

# Amplified circularly polarized luminescence of chiral lanthanide-based chains through helical assembly

Xue-Ting Wang,<sup>1</sup> Fang-Wen Lv,<sup>1</sup> Hang Qin,<sup>2</sup> Xin-Tong Dai,<sup>2</sup> Shan Jin,<sup>\*1</sup> and Xiu-Ying Zheng<sup>\*1</sup>

<sup>1</sup> Institutes of Physical Science and Information Technology, Key Laboratory of Structure and Functional Regulation of Hybrid Materials of Ministry of Education, Anhui University, Hefei, 230601, P. R. China.

<sup>2</sup> School of Materials Science and Engineering, Anhui University, 230601, P. R. China

Email: jinshan@ahu.edu.cn, xyzheng@ahu.edu.cn

## Materials and Physical Measurements.

All reagents were commercially available and were used without further purification. **Caution!** An aqueous solution of  $\text{Ln}(\text{ClO}_4)_3$  (1.0 M) was prepared by the reaction of  $\text{Ln}_2\text{O}_3$  ( $\text{Ln} = \text{Eu}, \text{Tb}$ ) and perchloric acid (70.0% – 72.0%) in the fume cupboard. Elemental analyses (EA) (C, H and N) were carried out using a Vario EL–3 elemental analyzer. The infrared spectrum was recorded on a VERTEX 80 FT–IR Spectrophotometer with pressed KBr pellets. A Rigaku Ultima IV Powder X-ray diffractometer verified the purity and stability of the powder sample. The fluorescence data were collected by Horiba Fluoro max plus. The decay lifetimes were recorded on Horiba Fluoro max plus with micro-second pulse lamp as the excitation source. The quantum yields were recorded on spectrofluorometer FS 5. Powder samples of the chiral compounds and KBr were mixed in a mortar and ground thoroughly using a pestle. The resulting mixture was compressed under a pressure of 10 MPa to form a thin disc. The intrinsic circularly polarized luminescence (CPL) spectra were measured on JASCO CPL-300 spectrometer with pressed KBr pellet. The circular dichroism (CD) spectra were measured using JASCO J-1700 circular dichroism spectrometer with pressed KBr pellet. Magnetic measurements (2 – 300 K) were investigated for powdered samples on a Quantum Design SQUID MPMS-XL magnetometer.

**X-ray crystallography.** The crystal data of compounds ***R/S*-Ln** and ***R/S*-Ln-phen** ( $\text{Ln} = \text{Eu/Tb}$ ) were collected on a STOE STADIVARI detector with  $\text{Cu } K_\alpha$  radiation ( $\lambda = 1.54184 \text{ \AA}$ ) at 120 K. Absorption corrections were applied by using the multi-scan program STOE LANA. The structures were solved by direct methods, and non-hydrogen atoms were refined anisotropically by least-squares on  $F^2$  using the OLEX2 program.<sup>1-2</sup> The hydrogen atoms of organic ligands were generated geometrically (C–H, 0.96  $\text{\AA}$ ). Crystal data as well as details of data collection and refinement for the complexes are summarized in Tables S1-S2. Selected bonds are showed in Tables S3-S10. These disorder solvent molecules were removed using SQUEEZE.<sup>3</sup> CCDC numbers of 2379931-2379938 for ***R/S*-Ln** and ***R/S*-Ln-phen** ( $\text{Ln} = \text{Eu/Tb}$ ) can be obtained free of charge from [http://www.ccdc.cam.ac.uk/data\\_request/cif](http://www.ccdc.cam.ac.uk/data_request/cif).

**Synthesis of  $\{[\text{Eu}(\text{R-L})_2(\text{H}_2\text{O})_2] \cdot (\text{ClO}_4)\}_n$  (**R-Eu**).**

(*R*)-alpha-Methoxyphenylacetic acid (*R*-HL, 0.5 mmol, 83 mg),  $\text{Eu}(\text{ClO}_4)_3$  (1.0 mL, 1.0 M) were dissolved in MeCN (10.5 mL). Then, Freshly prepared NaOH (1200  $\mu\text{L}$ , 1.0 M) was added dropwise with stirring. The resulted mixture quickly became turbid, and then gradually clarified in a short time under vigorous stirring. After heating and stirring at approximately 130°C for 3 h, the mixture was filtered and evaporated under ambient conditions. After approximately 2 weeks, the colorless block crystals were obtained (yield 11% based on  $\text{Eu}(\text{ClO}_4)_3$ ). Anal. Calcd (%) for  $\text{C}_{18}\text{H}_{22}\text{ClEuO}_{12}$  (FW = 617.76): C: 34.99, H: 3.59. Found (%): C: 34.23, H: 3.57. Selected IR peaks ( $\text{cm}^{-1}$ ): 3420 (s), 2975 (w), 2948 (w), 1653 (s), 1594 (w), 1441 (s), 1347 (m), 1305 (w), 1264 (w), 1194 (w), 1136 (w), 1085 (w), 1055 (w), 984 (w), 962 (w), 922 (w), 793 (w), 738 (w), 703 (w), 624 (w), 594 (w), 526 (w).

**Synthesis of  $\{[\text{Eu}(\text{S-L})_2(\text{H}_2\text{O})_2] \cdot (\text{ClO}_4)\}_n$  (**S-Eu**).**

Compound **S-Eu** was prepared using the same procedures as described above for the synthesis of **R-Eu** but using (*S*)-alpha-Methoxyphenylacetic acid (*S*-HL) to replace *R*-HL. After approximately 2 weeks, the colorless block crystals were obtained (yield 11% based on  $\text{Eu}(\text{ClO}_4)_3$ ). Anal. Calcd (%) for  $\text{C}_{18}\text{H}_{22}\text{ClEuO}_{12}$  (FW = 617.76): C: 34.99, H: 3.59. Found (%): C: 34.19, H: 3.58. Selected IR peaks ( $\text{cm}^{-1}$ ): 3420 (s), 2975 (w), 2948 (w), 1653 (s), 1594 (w), 1441 (s), 1347 (m), 1305 (w), 1264 (w), 1194 (w), 1136 (w), 1085 (w), 1055 (w), 984 (w), 962 (w), 922 (w), 793 (w), 738 (w), 703 (w), 624 (w), 594 (w), 526 (w).

**Synthesis of  $\{[\text{Tb}(\text{R-L})_2(\text{H}_2\text{O})_2] \cdot (\text{ClO}_4)\}_n$  (**R-Tb**).**

Compound **R-Tb** was prepared using the same procedures as described above for the synthesis of **R-Eu** but freshly made NaOH (1200  $\mu\text{L}$ , 1.0 M) was replaced with freshly made NaOH (2100  $\mu\text{L}$ , 1.0 M) and using  $\text{Tb}(\text{ClO}_4)_3$  to replace  $\text{Eu}(\text{ClO}_4)_3$ . After approximately 2 weeks, the colorless block crystals were obtained (yield 10% based on  $\text{Tb}(\text{ClO}_4)_3$ ). Anal. Calcd (%) for  $\text{C}_{18}\text{H}_{22}\text{ClTbO}_{12}$  (FW = 624.72): C: 34.60, H: 3.55. Found (%): C: 33.31, H: 3.51. Selected IR peaks ( $\text{cm}^{-1}$ ): 3420 (s), 2975 (w), 2948 (w),

1653 (s), 1594 (w), 1441 (s), 1347 (m), 1305 (w), 1264 (w), 1194 (w), 1136 (w), 1085 (w), 1055 (w), 984 (w), 962 (w), 922 (w), 793 (w), 738 (w), 703 (w), 624 (w), 594 (w), 526 (w).

#### **Synthesis of $\{[\text{Tb}(\text{S-L})_2(\text{H}_2\text{O})_2] \cdot (\text{ClO}_4)\}_n$ (**S-Tb**).**

Compound **S-Tb** was prepared using the same procedures as described above for the synthesis of **R-Tb** but using *S*-HL to replace *R*-HL. After approximately 2 weeks, the colorless block crystals were obtained (yield 10% based on  $\text{Tb}(\text{ClO}_4)_3$ ). Anal. Calcd (%) for  $\text{C}_{18}\text{H}_{22}\text{ClTbO}_{12}$  (FW = 624.72): C: 34.61, H: 3.55. Found (%): C: 33.28, H: 3.52. Selected IR peaks ( $\text{cm}^{-1}$ ): 3420 (s), 2975 (w), 2948 (w), 1653 (s), 1594 (w), 1441 (s), 1347 (m), 1305 (w), 1264 (w), 1194 (w), 1136 (w), 1085 (w), 1055 (w), 984 (w), 962 (w), 922 (w), 793 (w), 738 (w), 703 (w), 624 (w), 594 (w), 526(w).

#### **Synthesis of $\{[\text{Eu}_2(\text{R-L})_5(\text{phen})_2(\text{H}_2\text{O})] \cdot (\text{ClO}_4) \cdot (\text{H}_2\text{O})_{0.5}\}_n$ (**R-Eu-phen**).**

*R*-HL (0.5 mmol, 83 mg), 1,10-Phenanthroline (phen, 0.2 mmol, 36 mg),  $\text{Eu}(\text{ClO}_4)_3$  (1.0 mL, 1.0 M) were dissolved in MeCN (10.7 mL). Then, Freshly prepared NaOH (500  $\mu\text{L}$ , 1.0 M) was added dropwise with stirring. The resulted mixture quickly became turbid, and then gradually clarified in a short time under vigorous stirring. After heating and stirring at approximately 130 °C for 3 h, the mixture was filtered and evaporated under ambient conditions. After approximately 2 weeks, the colorless block crystals were obtained (yield 13% based on  $\text{Eu}(\text{ClO}_4)_3$ ). Anal. Calcd (%) for  $\text{C}_{69}\text{H}_{64}\text{ClEu}_2\text{N}_4\text{O}_{20.5}$  (FW = 1616.61): C: 51.26, H: 3.99, N: 3.47. Found (%): C: 51.08, H: 3.99, N: 3.19. Selected IR peaks ( $\text{cm}^{-1}$ ): 3437 (s), 3070 (m), 2931 (m), 2830 (w), 1963 (w), 1585 (s), 1427 (w), 1334 (w), 1200 (w), 1092 (s), 980 (w), 856 (w), 725 (m), 613 (w).

#### **Synthesis of $\{[\text{Eu}_2(\text{S-L})_5(\text{phen})_2(\text{H}_2\text{O})] \cdot (\text{ClO}_4) \cdot (\text{H}_2\text{O})_{0.5}\}_n$ (**S-Eu-phen**).**

Compound **S-Eu-phen** was prepared using the same procedures as described above for the synthesis of **R-Eu-phen** but using *S*-HL to replace *R*-HL. After approximately 2 weeks, the colorless block crystals were obtained (yield 13% based on  $\text{Eu}(\text{ClO}_4)_3$ ).

Anal. Calcd (%) for  $C_{69}H_{64}ClEu_2N_4O_{20.5}$  (FW = 1616.61): C: 51.26, H: 3.99, N: 3.47. Found (%): C: 51.18, H: 3.97, N: 3.13. Selected IR peaks ( $cm^{-1}$ ): 3437 (s), 3070 (m), 2931 (m), 2830 (w), 1963 (w), 1585 (s), 1427 (w), 1334 (w), 1200 (w), 1092 (s), 980 (w), 856 (w), 725 (m), 613 (w).

**Synthesis of  $\{[Tb_2(R-L)_5(phen)_2(H_2O)] \cdot (ClO_4) \cdot (H_2O)_{0.5}\}_n$  (*R*-Tb-phen).**

Compound ***R*-Tb-phen** was prepared using the same procedures as described above for the synthesis of ***R*-Eu-phen** but freshly made NaOH (1210  $\mu$ L, 1.0 M) was replaced with freshly made NaOH (500  $\mu$ L, 1.0 M) and using  $Tb(ClO_4)_3$  to replace  $Eu(ClO_4)_3$ . After approximately 2 weeks, the colorless block crystals were obtained (yield 12% based on  $Tb(ClO_4)_3$ ). Anal. Calcd (%) for  $C_{69}H_{64}ClTb_2N_4O_{20.5}$  (FW = 1630.53): C: 50.83, H: 3.96, N: 3.44. Found (%): C: 50.95, H: 3.93, N: 3.09. Selected IR peaks ( $cm^{-1}$ ): 3437 (s), 3070 (m), 2931 (m), 2830 (w), 1963 (w), 1585 (s), 1427 (w), 1334 (w), 1200 (w), 1092 (s), 980 (w), 856 (w), 725 (m), 613 (w).

**Synthesis of  $\{[Tb_2(S-L)_5(phen)_2(H_2O)] \cdot (ClO_4) \cdot (H_2O)_{0.5}\}_n$  (*S*-Tb-phen).**

Compound ***S*-Tb-phen** was prepared using the same procedures as described above for the synthesis of ***R*-Tb-phen** but using *S*-HL to replace *R*-HL. After approximately 2 weeks, the colorless block crystals were obtained (yield 12% based on  $Tb(ClO_4)_3$ ). Anal. Calcd (%) for  $C_{69}H_{64}ClTb_2N_4O_{20.5}$  (FW = 1630.53): C: 50.83, H: 3.96, N: 3.44. Found (%): C: 50.66, H: 3.96, N: 3.44. Selected IR peaks ( $cm^{-1}$ ): 3437 (s), 3070 (m), 2931 (m), 2830 (w), 1963 (w), 1585 (s), 1427 (w), 1334 (w), 1200 (w), 1092 (s), 980 (w), 856 (w), 725 (m), 613 (w).

**The detailed fitting procedure for the various optical parameters presented in Table 1.**

$\tau_{\text{obs}}$ : the luminescence decay lifetime fitted by a mono-exponential function.  $I(t) = I_0 + A_1 \exp(-t/\tau_{\text{obs}})$ .  $I(t)$ , the fluorescence intensity versus time  $t$ .  $I_0$ , the initial luminescence intensity.  $A_1$ , the scalar quantity obtained upon curve fitting.  $t$ , the time.

$\tau_r$ : decay lifetime.  $1/\tau_r = AM_{D,0} n^3 (I_{\text{tot}}/I_{\text{MD}})$ .  $AM_{D,0}$ , the Einstein coefficient of the MD transition equal to  $14.65 \text{ s}^{-1}$ .  $n$ , the refractive index.  $I_{\text{tot}}$ , a ratio of the total integrated emission.  $I_{\text{MD}}$ , the integrated intensity of the MD transition emission.

$k_r$ : radiative decay rate constant.  $k_r = 1/\tau_r$ .  $\tau_r$ , decay lifetime.

$k_{\text{nr}}$ : non-radiative decay rate constant.  $\tau_{\text{obs}} = 1/(k_r + k_{\text{nr}})$ .  $k_r$ , radiative decay rate constant.  $\tau_{\text{obs}}$ , the luminescence decay lifetime.

$\Phi_{\text{Eu}}$ : absolute emission photoluminescence quantum yield.  $\Phi_{\text{Eu}} = \tau_{\text{obs}}/\tau_r$ .  $\tau_{\text{obs}}$ , the luminescence decay lifetime.  $\tau_r$ , decay lifetime.

$\Phi_{\text{tot}}$ : the photoluminescence quantum yield.

$\eta_{\text{sens}}$ : the sensitization efficiency.  $\eta_{\text{sens}} = \Phi_{\text{tot}}/\Phi_{\text{Eu}}$ .  $\Phi_{\text{tot}}$ , the photoluminescence quantum yield.  $\Phi_{\text{Eu}}$ , absolute emission photoluminescence quantum yield.

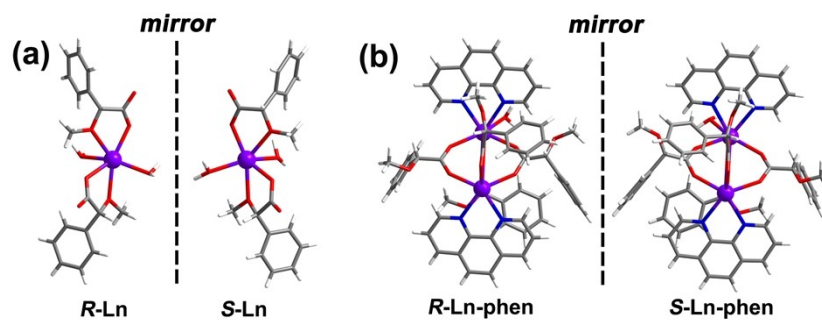

**Fig. S1** (a) The asymmetric unit  $[\text{Ln}(\text{R/S-L})_2(\text{H}_2\text{O})_2]^+$  in ***R/S-Ln***; (b) the minimum repeat unit  $[\text{Ln}(\text{R/S-L})_4(\text{phen})_2(\text{H}_2\text{O})]^{2+}$  in ***R/S-Ln-phen***.

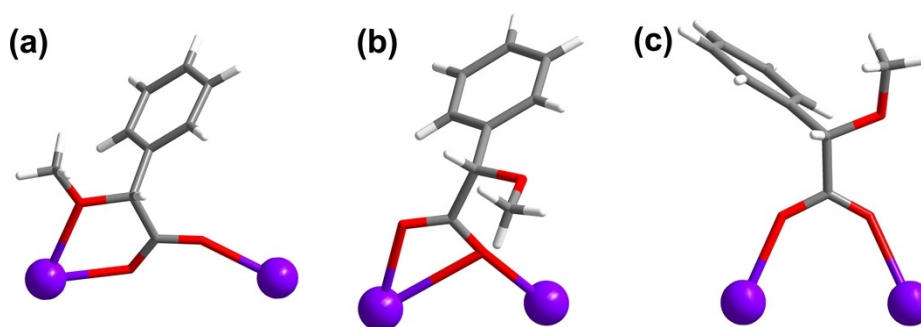

**Fig. S2** The different bridging modes of  $\text{R/S-L}^-$  with  $\text{Ln}^{3+}$  ions in ***R/S-Ln*** and ***R/S-Ln-phen***.

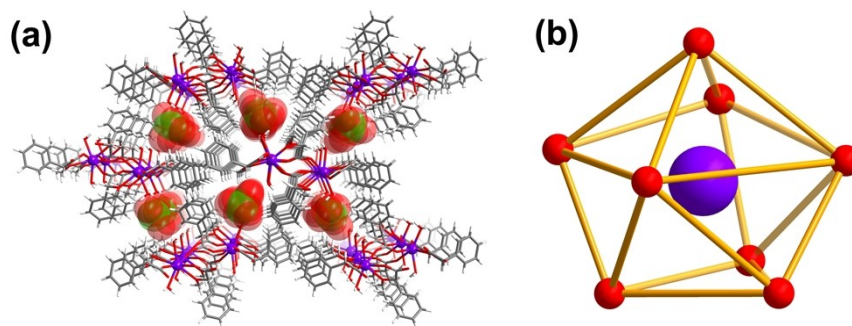

**Fig. S3** (a) The 3D framework  $\{[\text{Ln}(\text{R/S-L})_2(\text{H}_2\text{O})_2] \cdot (\text{ClO}_4)\}_n$  of 1D chain ***R/S-Ln*** formed by the hydrogen bond between the H atoms from the chain and the O atoms on free counter anion  $\text{ClO}_4^-$ ; (b) the octa-coordinated  $\text{Ln}^{3+}$  in ***R/S-Ln*** featuring biaugmented trigonal prism geometric configuration.

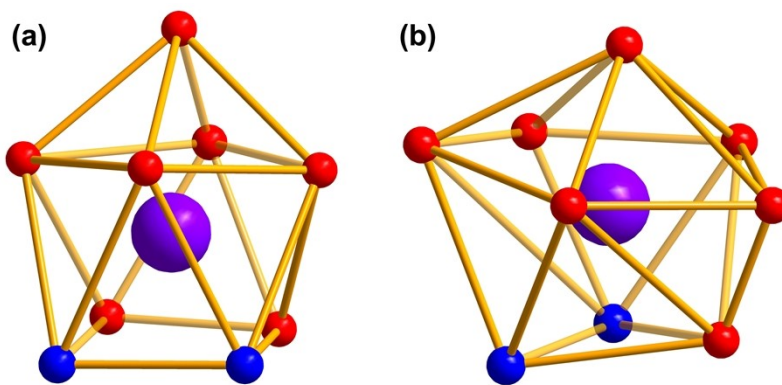

**Fig. S4** For *R/S*-Ln-phen, the nine coordination mode of Ln<sup>3+</sup> featuring (a) capped square antiprism geometry and (b) muffin geometry.

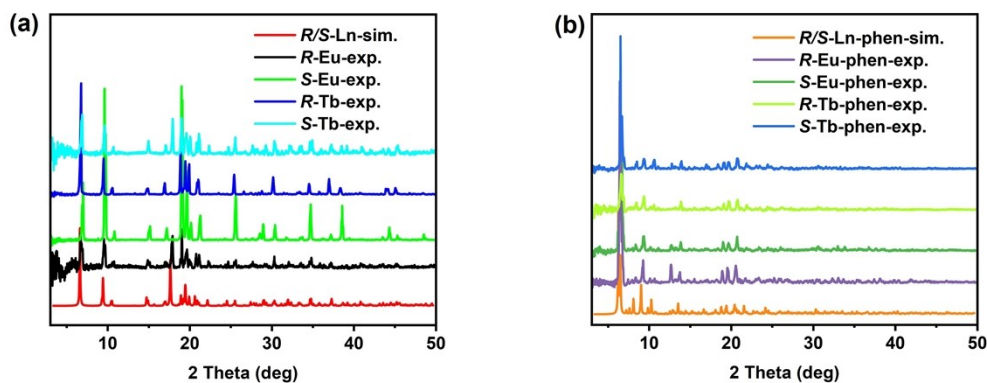

**Fig. S5** (a) and (b) are the experimental and simulated PXRD spectra of *R/S*-Ln and *R/S*-Ln-phen (Ln = Eu/Tb), respectively.

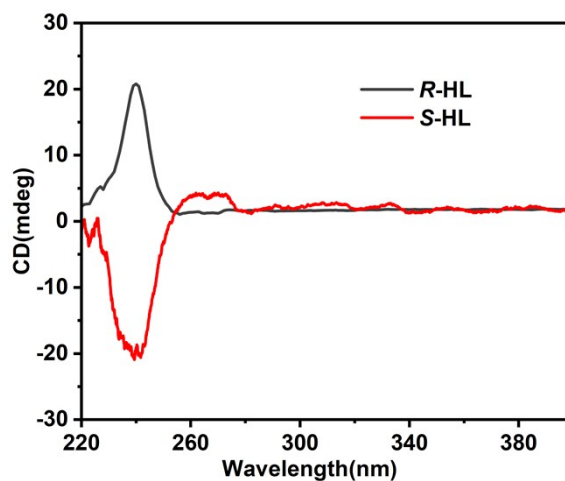

**Fig. S6** The solid-state CD spectrum of chiral ligand *R/S*-HL.



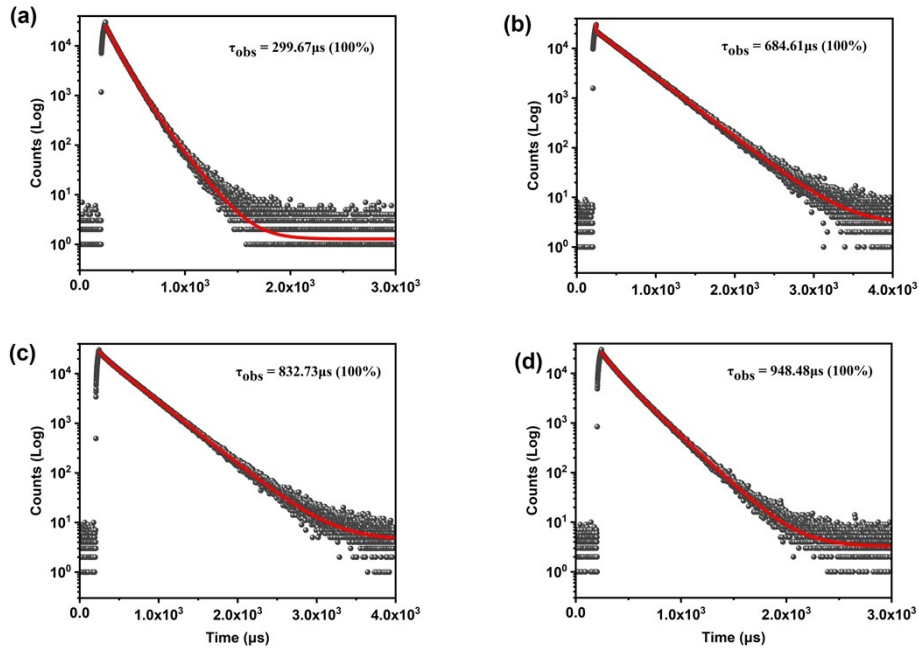

**Fig. S7** The luminescence decay curves of (a) *S*-Eu, (b) *S*-Tb, (c) *S*-Eu-phen (d) *S*-Tb-phen fitted by a mono-exponential function.

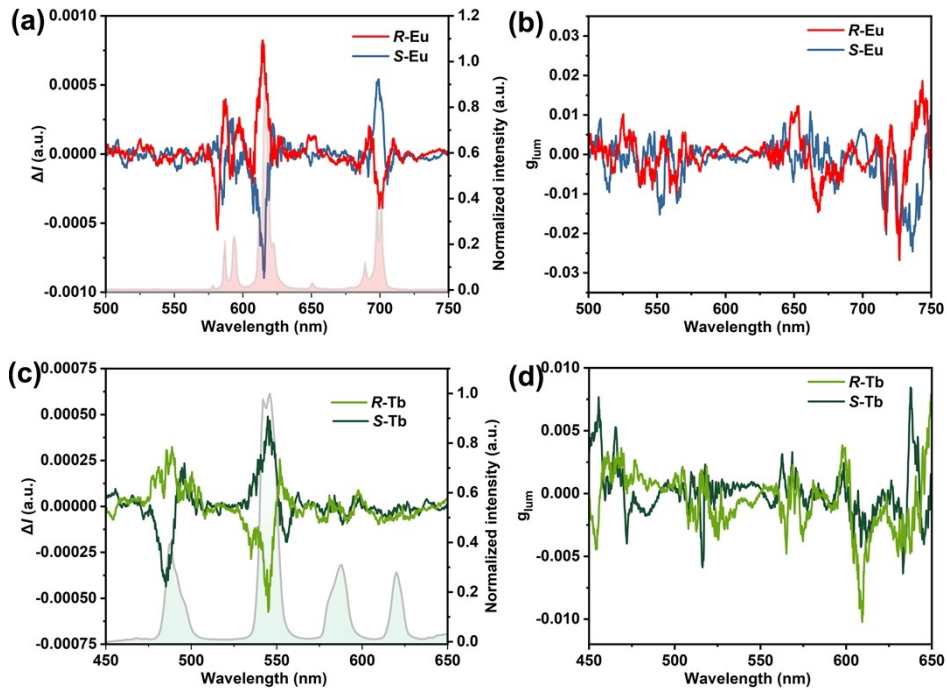

**Fig. S8** (a) and (c) are the solid-state CPL spectra of *R/S*-Eu ( $\lambda_{\text{ex}} = 395$  nm) and *R/S*-Tb ( $\lambda_{\text{ex}} = 370$  nm), respectively. Normalized luminescence is traced in the background. (b) and (d) are the  $g_{\text{lum}}$  spectra of *R/S*-Eu and *R/S*-Tb.

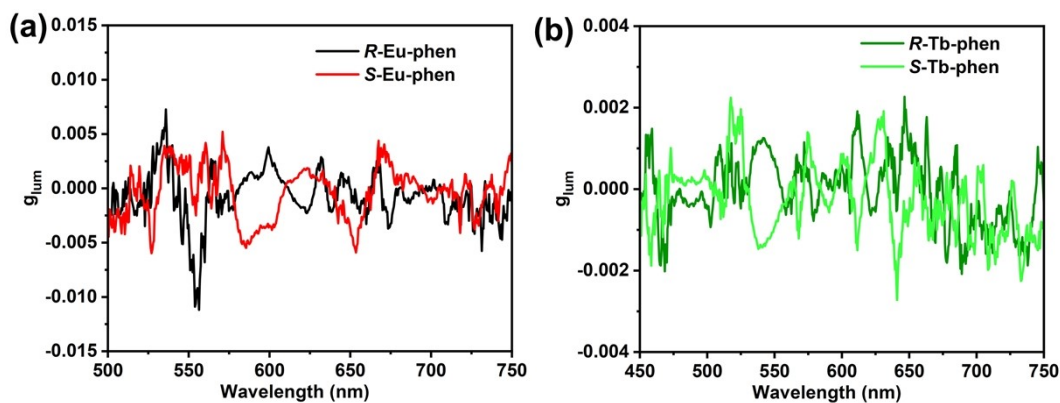

**Fig. S9** The  $g_{lum}$  spectra of (a) *R/S*-Eu-phen and (b) *R/S*-Tb-phen.

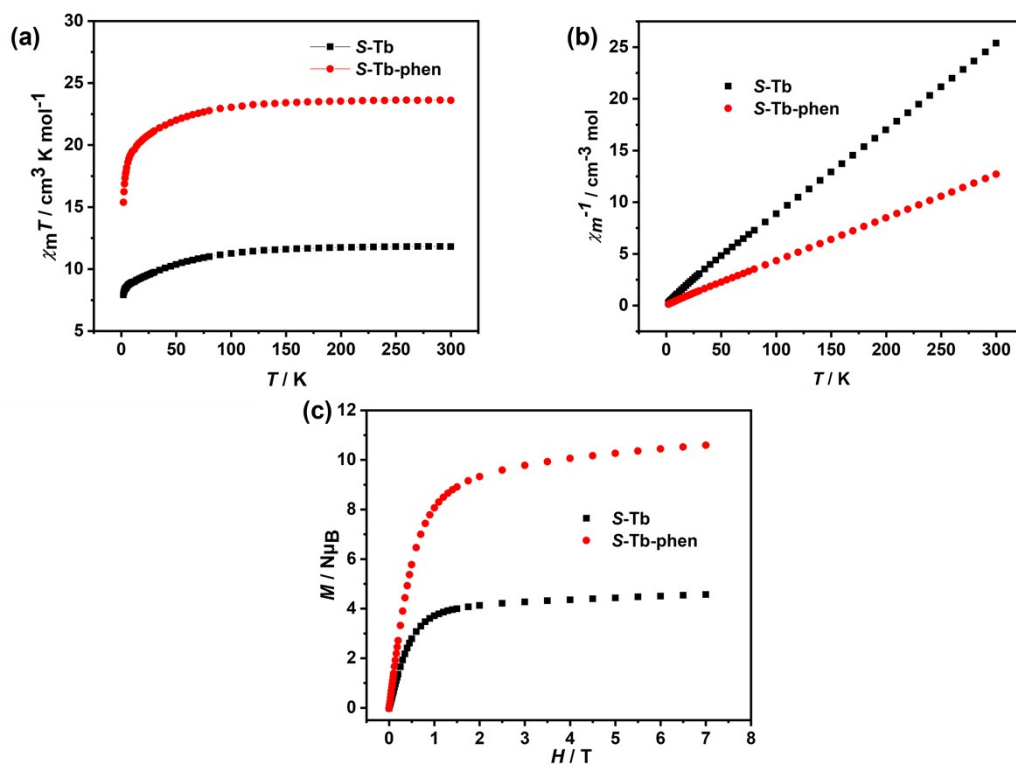

**Fig. S10** (a) The magnetic susceptibility of *S-Tb* and *S-Tb-phen* was measured using the dried powder samples in the temperature range of 2 – 300 K and in a direct field of 1000 Oe; (b) the fitting of  $\chi_m^{-1}$  vs  $T$  based on Curie-Weiss law for *S-Tb* and *S-Tb-phen*; (c) field dependence of the magnetization plots of *S-Tb* and *S-Tb-phen* at the indicated temperatures.

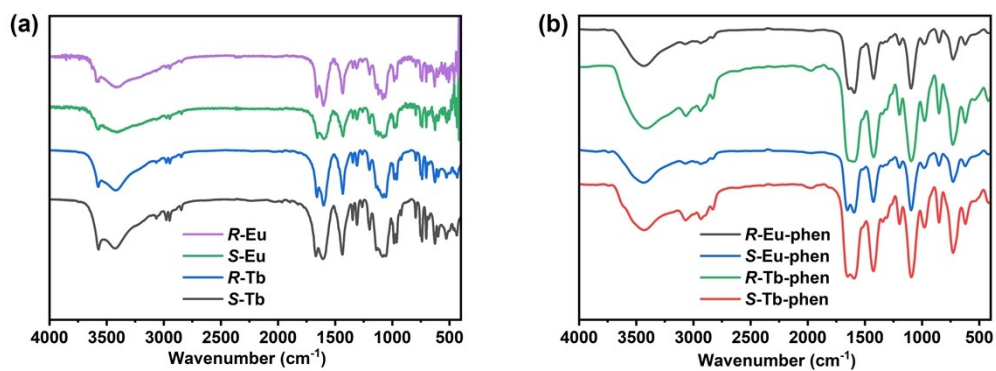

**Fig. S11** (a) and (b) are the IR spectra of  $R/S$ -Ln and  $R/S$ -Ln-phen (Ln = Eu/Tb), respectively.

**Table S1.** Crystallographic data for compounds **R/S-Ln** (Ln = Eu/Tb).

| Compound                                         | <b>R-Eu</b>                                         | <b>S-Eu</b>                                         | <b>R-Tb</b>                                         | <b>S-Tb</b>                                         |
|--------------------------------------------------|-----------------------------------------------------|-----------------------------------------------------|-----------------------------------------------------|-----------------------------------------------------|
| Formula                                          | C <sub>18</sub> H <sub>22</sub> ClEuO <sub>12</sub> | C <sub>18</sub> H <sub>22</sub> ClEuO <sub>12</sub> | C <sub>18</sub> H <sub>22</sub> ClTbO <sub>12</sub> | C <sub>18</sub> H <sub>22</sub> ClTbO <sub>12</sub> |
| FW                                               | 617.76                                              | 617.76                                              | 624.72                                              | 624.72                                              |
| T/K                                              | 120                                                 | 120                                                 | 120                                                 | 120                                                 |
| Cry. system                                      | orthorhombic                                        | orthorhombic                                        | orthorhombic                                        | orthorhombic                                        |
| Space group                                      | <i>P2<sub>1</sub>2<sub>1</sub>2<sub>1</sub></i>     | <i>P2<sub>1</sub>2<sub>1</sub>2<sub>1</sub></i>     | <i>P2<sub>1</sub>2<sub>1</sub>2<sub>1</sub></i>     | <i>P2<sub>1</sub>2<sub>1</sub>2<sub>1</sub></i>     |
| <i>a</i> /Å                                      | 6.2461(2)                                           | 18.7671(4)                                          | 18.7651(8)                                          | 18.7948(7)                                          |
| <i>b</i> /Å                                      | 18.7509(5)                                          | 19.0219(3)                                          | 18.9706(10)                                         | 18.9335(7)                                          |
| <i>c</i> /Å                                      | 19.0329 (4)                                         | 6.25350(10)                                         | 6.2102(3)                                           | 6.2122(3)                                           |
| $\alpha$ /°                                      | 90                                                  | 90                                                  | 90                                                  | 90                                                  |
| $\beta$ /°                                       | 90                                                  | 90                                                  | 90                                                  | 90                                                  |
| $\gamma$ /°                                      | 90                                                  | 90                                                  | 90                                                  | 90                                                  |
| V/Å <sup>3</sup>                                 | 2229.13(10)                                         | 2232.41(7)                                          | 2210.74(18)                                         | 2210.62(16)                                         |
| Z                                                | 4                                                   | 4                                                   | 4                                                   | 4                                                   |
| $\rho_c$ /g cm <sup>-3</sup>                     | 1.841                                               | 1.838                                               | 1.877                                               | 1.877                                               |
| $\mu$ /mm <sup>-1</sup>                          | 21.806                                              | 21.774                                              | 17.410                                              | 17.411                                              |
| Data/parameters                                  | 4229/319                                            | 4108/296                                            | 3837/318                                            | 4000/319                                            |
| $2\theta$ /°                                     | 6.618-155.568                                       | 6.616-138.834                                       | 9.324-132.942                                       | 6.626-138.744                                       |
| Obs. reflections                                 | 4917                                                | 35515                                               | 10260                                               | 10911                                               |
| F(000)                                           | 1224                                                | 1224                                                | 1232.0                                              | 1232..0                                             |
| GOF                                              | 1.037                                               | 1.047                                               | 1.065                                               | 1.034                                               |
| R <sub>1</sub> [I > 2 $\sigma$ (I)] <sup>a</sup> | 0.0693                                              | 0.0252                                              | 0.0467                                              | 0.0429                                              |
| wR <sub>2</sub> (All data) <sup>b</sup>          | 0.1933                                              | 0.0592                                              | 0.1242                                              | 0.1149                                              |

$$^a R_1 = \frac{\sum ||F_O| - |F_C||}{\sum |F_O|}; \quad ^b wR_2 = \left\{ \frac{\sum [w(F_O^2 - F_C^2)^2]}{\sum [w(F_O^2)^2]} \right\}^{1/2}$$

**Table S2.** Crystallographic data for compounds *R/S*-Ln-phen (Ln = Eu/Tb).

| Compound                                         | <i>R</i> -Eu-phen                                                                  | <i>S</i> -Eu-phen                                                                  | <i>R</i> -Tb-phen                                                                  | <i>S</i> -Tb-phen                                                                  |
|--------------------------------------------------|------------------------------------------------------------------------------------|------------------------------------------------------------------------------------|------------------------------------------------------------------------------------|------------------------------------------------------------------------------------|
| Formula                                          | C <sub>69</sub> H <sub>64</sub> ClEu <sub>2</sub> N <sub>4</sub> O <sub>20.5</sub> | C <sub>69</sub> H <sub>64</sub> ClEu <sub>2</sub> N <sub>4</sub> O <sub>20.5</sub> | C <sub>69</sub> H <sub>64</sub> ClN <sub>4</sub> O <sub>20.5</sub> Tb <sub>2</sub> | C <sub>69</sub> H <sub>64</sub> ClN <sub>4</sub> O <sub>20.5</sub> Tb <sub>2</sub> |
| FW                                               | 1616.61                                                                            | 1616.61                                                                            | 1630.53                                                                            | 1630.53                                                                            |
| T/K                                              | 120                                                                                | 120                                                                                | 120                                                                                | 120                                                                                |
| Cry. system                                      | monoclinic                                                                         | monoclinic                                                                         | monoclinic                                                                         | monoclinic                                                                         |
| Space group                                      | <i>P</i> 2 <sub>1</sub>                                                            | <i>P</i> 2 <sub>1</sub>                                                            | <i>P</i> 2 <sub>1</sub>                                                            | <i>P</i> 2 <sub>1</sub>                                                            |
| <i>a</i> /Å                                      | 13.7229(8)                                                                         | 13.6925(2)                                                                         | 13.7334(5)                                                                         | 13.6917(7)                                                                         |
| <i>b</i> /Å                                      | 28.1271(19)                                                                        | 28.1386(4)                                                                         | 28.0916(7)                                                                         | 28.1150(14)                                                                        |
| <i>c</i> /Å                                      | 17.3870(10)                                                                        | 17.4098(2)                                                                         | 17.3794(6)                                                                         | 17.3468(9)                                                                         |
| <i>α</i> /°                                      | 90                                                                                 | 90                                                                                 | 90                                                                                 | 90                                                                                 |
| <i>β</i> /°                                      | 99.673(5)                                                                          | 99.5968(13)                                                                        | 99.823(3)                                                                          | 99.903(4)                                                                          |
| <i>γ</i> /°                                      | 90                                                                                 | 90                                                                                 | 90                                                                                 | 90                                                                                 |
| V/Å <sup>3</sup>                                 | 6615.7(7)                                                                          | 6613.88(16)                                                                        | 6606.6(4)                                                                          | 6578.0(6)                                                                          |
| Z                                                | 4                                                                                  | 4                                                                                  | 4                                                                                  | 4                                                                                  |
| $\rho_c$ /g cm <sup>-3</sup>                     | 1.623                                                                              | 1.624                                                                              | 1.639                                                                              | 1.646                                                                              |
| $\mu$ /mm <sup>-1</sup>                          | 14.475                                                                             | 14.479                                                                             | 11.432                                                                             | 11.481                                                                             |
| Data/parameters                                  | 17660/1746                                                                         | 21356/1747                                                                         | 19131/1747                                                                         | 21994/1741                                                                         |
| 2 $\theta$ /°                                    | 6.038-129.994                                                                      | 5.148-129.982                                                                      | 7.252-139.242                                                                      | 6.052-133                                                                          |
| Obs. reflections                                 | 38793                                                                              | 65693                                                                              | 74197                                                                              | 61886                                                                              |
| F(000)                                           | 3252.0                                                                             | 3252.0                                                                             | 3268.0                                                                             | 3268.0                                                                             |
| GOF                                              | 1.073                                                                              | 1.028                                                                              | 1.014                                                                              | 1.125                                                                              |
| R <sub>1</sub> [I > 2 $\sigma$ (I)] <sup>a</sup> | 0.0528                                                                             | 0.0727                                                                             | 0.0815                                                                             | 0.0880                                                                             |
| wR <sub>2</sub> (All data) <sup>b</sup>          | 0.1278                                                                             | 0.0897                                                                             | 0.2268                                                                             | 0.2318                                                                             |

$$^a R_1 = \frac{\sum ||F_o| - |F_c||}{\sum |F_o|}; \quad ^b wR_2 = \left\{ \frac{\sum [w(F_o^2 - F_c^2)^2]}{\sum [w(F_o^2)^2]} \right\}^{1/2}$$

**Table S3.** Selected bond distances (Å) and bond angles (°) of **R-Eu**.

|                                                                       |           |                                      |           |
|-----------------------------------------------------------------------|-----------|--------------------------------------|-----------|
| Eu1-O1 <sup>1</sup>                                                   | 2.490(9)  | Eu1-O5                               | 2.411(9)  |
| Eu1-O2                                                                | 2.322(9)  | Eu1-O6                               | 2.467(10) |
| Eu1-O3 <sup>2</sup>                                                   | 2.515(8)  | Eu1-O8 <sup>2</sup>                  | 2.372(9)  |
| Eu1-O4                                                                | 2.319(10) | Eu1-O9 <sup>1</sup>                  | 2.352(8)  |
| Symmetry code: <sup>1</sup> -1/2+X,3/2-Y,1-Z; <sup>2</sup> 1+X,+Y,+Z. |           |                                      |           |
| O1 <sup>1</sup> -Eu1-O3 <sup>2</sup>                                  | 138.1(3)  | C10-O1-Eu1 <sup>3</sup>              | 120.7(5)  |
| O2-Eu1-O1 <sup>1</sup>                                                | 125.4(3)  | C11-O1-Eu1 <sup>3</sup>              | 126.0(7)  |
| O2-Eu1-O3 <sup>2</sup>                                                | 81.9(3)   | C6-O2-Eu1                            | 153.2(7)  |
| O2-Eu1-O5                                                             | 74.5(4)   | C8-O3-Eu1 <sup>4</sup>               | 119.3(5)  |
| O2-Eu1-O6                                                             | 74.1(3)   | C9-O3-Eu1 <sup>4</sup>               | 123.7(8)  |
| O2-Eu1-O8 <sup>2</sup>                                                | 137.0(3)  | C16-O4-Eu1                           | 155.3(8)  |
| O2-Eu1-O9 <sup>1</sup>                                                | 82.3(3)   | C6-O8-Eu1 <sup>4</sup>               | 123.0(7)  |
| O4-Eu1-O1 <sup>1</sup>                                                | 78.4(3)   | C16-O9-Eu1 <sup>3</sup>              | 125.4(6)  |
| O4-Eu1-O2                                                             | 139.3(4)  | O5-Eu1-O6                            | 145.0(3)  |
| O4-Eu1-O3 <sup>2</sup>                                                | 101.4(3)  | O6-Eu1-O1 <sup>1</sup>               | 137.5(3)  |
| O4-Eu1-O5                                                             | 145.9(3)  | O6-Eu1-O3 <sup>2</sup>               | 75.6(3)   |
| O4-Eu1-O6                                                             | 67.8(3)   | O8 <sup>2</sup> -Eu1-O1 <sup>1</sup> | 77.3(3)   |
| O4-Eu1-O8 <sup>2</sup>                                                | 75.1(3)   | O8 <sup>2</sup> -Eu1-O3 <sup>2</sup> | 62.7(3)   |
| O4-Eu1-O9 <sup>1</sup>                                                | 80.7(4)   | O8 <sup>2</sup> -Eu1-O5              | 78.6(3)   |
| O5-Eu1-O1 <sup>1</sup>                                                | 75.0(3)   | O8 <sup>2</sup> -Eu1-O6              | 115.8(3)  |
| O5-Eu1-O3 <sup>2</sup>                                                | 84.9(3)   | O9 <sup>1</sup> -Eu1-O1 <sup>1</sup> | 64.3(3)   |
| O9 <sup>1</sup> -Eu1-O6                                               | 84.8(3)   | O9 <sup>1</sup> -Eu1-O3 <sup>2</sup> | 157.6(3)  |
| O9 <sup>1</sup> -Eu1-O8 <sup>2</sup>                                  | 137.9(3)  | O9 <sup>1</sup> -Eu1-O5              | 105.9(3)  |

Symmetry code:<sup>1</sup>-1/2+X,3/2-Y,1-Z; <sup>2</sup>1+X,+Y,+Z; <sup>3</sup>1/2+X,3/2-Y,1-Z; <sup>4</sup>-1+X,+Y,+Z.

**Table S4.** Selected bond distances (Å) and bond angles (°) of **S-Eu**.

|                                                                       |            |                                      |            |
|-----------------------------------------------------------------------|------------|--------------------------------------|------------|
| Eu1-O8 <sup>1</sup>                                                   | 2.502(4)   | Eu1-O1                               | 2.409(4)   |
| Eu1-O4                                                                | 2.320(4)   | Eu1-O6 <sup>1</sup>                  | 2.342(4)   |
| Eu1-O2                                                                | 2.327(3)   | Eu1-O3                               | 2.476(4)   |
| Eu1-O7 <sup>2</sup>                                                   | 2.511(4)   | Eu1-O5 <sup>2</sup>                  | 2.365(4)   |
| Symmetry code: <sup>1</sup> 3/2-X,1-Y,1/2+Z; <sup>2</sup> +X,+Y,-1+Z. |            |                                      |            |
| O8 <sup>1</sup> -Eu1-O7 <sup>2</sup>                                  | 137.97(12) | O5 <sup>2</sup> -Eu1-O1              | 78.47(14)  |
| O4-Eu1-O8 <sup>1</sup>                                                | 78.80(13)  | O5 <sup>2</sup> -Eu1-O3              | 115.86(14) |
| O4-Eu1-O2                                                             | 139.40(15) | O1-Eu1-O8 <sup>1</sup>               | 75.05(13)  |
| O4-Eu1-O7 <sup>2</sup>                                                | 100.89(14) | O1-Eu1-O7 <sup>2</sup>               | 84.83(14)  |
| O4-Eu1-O1                                                             | 146.00(14) | O1-Eu1-O3                            | 144.94(14) |
| O4-Eu1-O6 <sup>1</sup>                                                | 81.07(14)  | O2-Eu1-O3                            | 74.21(14)  |
| O4-Eu1-O3                                                             | 67.54(14)  | O2-Eu1-O5 <sup>2</sup>               | 137.00(13) |
| O4-Eu1-O5 <sup>2</sup>                                                | 74.73(14)  | O6 <sup>1</sup> -Eu1-O8 <sup>1</sup> | 64.95(12)  |
| O5 <sup>2</sup> -Eu1-O8 <sup>1</sup>                                  | 76.94(12)  | O6 <sup>1</sup> -Eu1-O7 <sup>2</sup> | 157.08(13) |
| O5 <sup>2</sup> -Eu1-O7 <sup>2</sup>                                  | 62.92(12)  | O6 <sup>1</sup> -Eu1-O1              | 106.45(15) |
| O2-Eu1-O8 <sup>1</sup>                                                | 125.54(13) | O6 <sup>1</sup> -Eu1-O3              | 84.38(14)  |
| O2-Eu1-O7 <sup>2</sup>                                                | 81.78(13)  | O6 <sup>1</sup> -Eu1-O5 <sup>2</sup> | 138.04(13) |
| O2-Eu1-O1                                                             | 74.43(15)  | O3-Eu1-O8 <sup>1</sup>               | 137.56(13) |
| O2-Eu1-O6 <sup>1</sup>                                                | 82.20(13)  | O3-Eu1-O7 <sup>2</sup>               | 75.55(13)  |
| O8 <sup>1</sup> -Eu1-O7 <sup>2</sup>                                  | 137.97(12) | O5 <sup>2</sup> -Eu1-O1              | 78.47(14)  |
| O4-Eu1-O8 <sup>1</sup>                                                | 78.80(13)  | O5 <sup>2</sup> -Eu1-O3              | 115.86(14) |
| O4-Eu1-O2                                                             | 139.40(15) | O1-Eu1-O8 <sup>1</sup>               | 75.05(13)  |
| O4-Eu1-O7 <sup>2</sup>                                                | 100.89(14) | O1-Eu1-O7 <sup>2</sup>               | 84.83(14)  |

Symmetry code: <sup>1</sup>3/2-X,1-Y,1/2+Z; <sup>2</sup>+X,+Y,-1+Z; <sup>3</sup>3/2-X,1-Y,-1/2+Z; <sup>4</sup>+X,+Y,1+Z.

**Table S5.** Selected bond distances (Å) and bond angles (°) of *R*-Tb.

|                                                                                                                                 |           |                                      |          |
|---------------------------------------------------------------------------------------------------------------------------------|-----------|--------------------------------------|----------|
| Tb1-O1 <sup>1</sup>                                                                                                             | 2.480(7)  | Tb1-O7 <sup>2</sup>                  | 2.372(7) |
| Tb1-O2                                                                                                                          | 2.300(7)  | Tb1-O8                               | 2.352(7) |
| Tb1-O3                                                                                                                          | 2.307(7)  | O1-Tb1 <sup>3</sup>                  | 2.480(7) |
| Tb1-O4 <sup>1</sup>                                                                                                             | 2.310(7)  | O4-Tb1 <sup>3</sup>                  | 2.310(7) |
| Tb1-O5                                                                                                                          | 2.411(7)  | O6-Tb1 <sup>4</sup>                  | 2.343(7) |
| Tb1-O6 <sup>2</sup>                                                                                                             | 2.467(7)  | O7-Tb1 <sup>4</sup>                  | 2.484(7) |
| Symmetry code: <sup>1</sup> 1/2-X,1-Y,1/2+Z; <sup>2</sup> +X,+Y,-1+Z; <sup>3</sup> 1/2-X,1-Y,-1/2+Z;<br><sup>4</sup> +X,+Y,1+Z. |           |                                      |          |
| O1 <sup>1</sup> -Tb1-O7 <sup>2</sup>                                                                                            | 137.6(32) | O2-Tb1-O1 <sup>1</sup>               | 78.7 (3) |
| O2-Tb1-O3                                                                                                                       | 139.6(3)  | C14-O2-Tb1                           | 155.3(6) |
| O2-Tb1-O4 <sup>1</sup>                                                                                                          | 80.5(3)   | C3-O3-Tb1                            | 152.8(6) |
| O2-Tb1-O5                                                                                                                       | 145.8(3)  | C14-O4-Tb1 <sup>3</sup>              | 125.5(5) |
| O2-Tb1-O6 <sup>2</sup>                                                                                                          | 74.9(3)   | C3-O6-Tb1 <sup>4</sup>               | 124.0(6) |
| O2-Tb1-O7 <sup>2</sup>                                                                                                          | 101.6(3)  | O2-Tb1-O8                            | 67.8(3)  |
| O3-Tb1-O1 <sup>1</sup>                                                                                                          | 125.4(3)  | O4 <sup>1</sup> -Tb1-O8              | 84.0(3)  |
| O3-Tb1-O4 <sup>1</sup>                                                                                                          | 82.1(3)   | O5-Tb1-O1 <sup>1</sup>               | 75.0(3)  |
| O3-Tb1-O5                                                                                                                       | 74.4(3)   | O5-Tb1-O7 <sup>2</sup>               | 84.0(3)  |
| O3-Tb1-O6 <sup>2</sup>                                                                                                          | 137.0(2)  | O5-Tb1-O8                            | 144.8(2) |
| O3-Tb1-O7 <sup>2</sup>                                                                                                          | 81.6(2)   | O6 <sup>2</sup> -Tb1-O1 <sup>1</sup> | 76.6(2)  |
| O3-Tb1-O8                                                                                                                       | 74.4(3)   | O6 <sup>2</sup> -Tb1-O5              | 78.0(3)  |
| O4 <sup>1</sup> -Tb1-O1 <sup>1</sup>                                                                                            | 65.7(2)   | O6 <sup>2</sup> -Tb1-O7 <sup>2</sup> | 63.1(2)  |
| O4 <sup>1</sup> -Tb1-O5                                                                                                         | 107.5(3)  | O6 <sup>2</sup> -Tb1-O8              | 115.9(3) |
| O4 <sup>1</sup> -Tb1-O6 <sup>2</sup>                                                                                            | 138.2(3)  | O8-Tb1-O1 <sup>1</sup>               | 138.0(2) |
| O4 <sup>1</sup> -Tb1-O7 <sup>2</sup>                                                                                            | 156.7(3)  | O8-Tb1-O7 <sup>2</sup>               | 75.6(3)  |

Symmetry code: <sup>1</sup>1/2-X,1-Y,1/2+Z; <sup>2</sup>+X,+Y,-1+Z; <sup>3</sup>1/2-X,1-Y,-1/2+Z; <sup>4</sup>+X,+Y,1+Z.



**Table S6.** Selected bond distances (Å) and bond angles (°) of **S-Tb**.

|                                                                       |          |                         |          |
|-----------------------------------------------------------------------|----------|-------------------------|----------|
| Tb1-O1 <sup>1</sup>                                                   | 2.476(6) | Tb1-O5                  | 2.411(6) |
| Tb1-O2 <sup>2</sup>                                                   | 2.479(6) | Tb1-O6                  | 2.292(6) |
| Tb1-O3                                                                | 2.369(6) | Tb1-O7                  | 2.432(7) |
| Tb1-O4 <sup>1</sup>                                                   | 2.305(6) | Tb1-O8 <sup>2</sup>     | 2.343(6) |
| Symmetry code: <sup>1</sup> 1/2-X,1-Y,1/2+Z; <sup>2</sup> +X,+Y,-1+Z. |          |                         |          |
| O1 <sup>1</sup> -Tb1-O2 <sup>2</sup>                                  | 138.3(2) | O3-Tb1-O1 <sup>1</sup>  | 74.6 (2) |
| O3-Tb1-O2 <sup>2</sup>                                                | 85.0(2)  | O3-Tb1-O7               | 145.0(2) |
| O4 <sup>1</sup> -Tb1-O1 <sup>1</sup>                                  | 65.4(2)  | C12-O4-Tb1 <sup>3</sup> | 124.9(5) |
| O4 <sup>1</sup> -Tb1-O2 <sup>2</sup>                                  | 156.2(2) | C6-O5-Tb1               | 152.2(6) |
| O4 <sup>1</sup> -Tb1-O3                                               | 106.4(2) | C12-O6-Tb1              | 154.2(6) |
| O4 <sup>1</sup> -Tb1-O7                                               | 83.9(2)  | C6-O8-Tb1 <sup>4</sup>  | 124.4(6) |
| O8 <sup>2</sup> -Tb1-O2 <sup>2</sup>                                  | 63.6(2)  | O8 <sup>2</sup> -Tb1-O7 | 116.3(2) |
| O8 <sup>2</sup> -Tb1-O1 <sup>1</sup>                                  | 76.7(2)  | O8 <sup>2</sup> -Tb1-O3 | 78.3(2)  |
| O4 <sup>1</sup> -Tb1-O8 <sup>2</sup>                                  | 138.3(2) | O7-Tb1-O2 <sup>2</sup>  | 75.4(2)  |
| O5-Tb1-O1 <sup>1</sup>                                                | 82.1(3)  | O7-Tb1-O1 <sup>1</sup>  | 137.8(2) |
| O5-Tb1-O2 <sup>2</sup>                                                | 81.4(2)  | O6-Tb1-O8 <sup>2</sup>  | 74.9 (2) |
| O5-Tb1-O3                                                             | 74.4(2)  | O6-Tb1-O7               | 67.4(2)  |
| O5-Tb1-O4 <sup>1</sup>                                                | 81.8(2)  | O6-Tb1-O2 <sup>2</sup>  | 101.0(2) |
| O5-Tb1-O7                                                             | 74.2(2)  | O6-Tb1-O3               | 146.1(2) |
| O5-Tb1-O8 <sup>2</sup>                                                | 137.0(2) | O6-Tb1-O4 <sup>1</sup>  | 81.2(2)  |
| O6-Tb1-O1 <sup>1</sup>                                                | 79.3(2)  | O6-Tb1-O5               | 139.3(2) |
| O4 <sup>1</sup> -Tb1-O6 <sup>2</sup>                                  | 138.2(3) | O8-Tb1-O1 <sup>1</sup>  | 138.0(2) |
| O4 <sup>1</sup> -Tb1-O7 <sup>2</sup>                                  | 156.7(3) | O8-Tb1-O7 <sup>2</sup>  | 75.6(3)  |

Symmetry code: <sup>1</sup>1/2-X,1-Y,1/2+Z; <sup>2</sup>+X,+Y,-1+Z; <sup>3</sup>1/2-X,1-Y,-1/2+Z; <sup>4</sup>+X,+Y,1+Z.

**Table S7.** Selected bond distances (Å) and bond angles (°) of ***R*-Eu-phen**.

|                                                                 |          |             |           |
|-----------------------------------------------------------------|----------|-------------|-----------|
| Eu1-O3                                                          | 2.403(9) | Eu1-O16     | 2.349(10) |
| Eu1-O9                                                          | 2.402(8) | Eu1-O20     | 2.601(9)  |
| Eu1-O12                                                         | 2.293(9) | Eu1-O21     | 2.938(9)  |
| Eu1-O15                                                         | 2.359(9) | Eu1-N3      | 2.604(11) |
| Symmetry code: <sup>1</sup> +X,+Y,-1+Z; <sup>2</sup> +X,+Y,1+Z. |          |             |           |
| O3-Eu1-O20                                                      | 69.9(3)  | O12-Eu1-O15 | 78.8(3)   |
| O3-Eu1-O21                                                      | 47.5(3)  | O12-Eu1-O16 | 77.5(3)   |
| O3-Eu1-N3                                                       | 141.4(4) | O12-Eu1-O20 | 150.0(3)  |
| O3-Eu1-N8                                                       | 138.6(3) | O12-Eu1-O21 | 77.0(3)   |
| O9-Eu1-O3                                                       | 74.7(3)  | O12-Eu1-N3  | 84.2(3)   |
| O9-Eu1-O20                                                      | 62.2(3)  | O12-Eu1-N8  | 81.1(3)   |
| O9-Eu1-O21                                                      | 116.4(3) | N8-Eu1-O21  | 142.7(3)  |
| O9-Eu1-N3                                                       | 98.6(3)  | N8-Eu1-O20  | 105.3(3)  |
| O9-Eu1-N8                                                       | 67.7(3)  | O12-Eu1-O9  | 142.8(3)  |
| O12-Eu1-O3                                                      | 124.3(3) | N3-Eu1-O21  | 141.9(3)  |
| O20-Eu1-N3                                                      | 73.4(3)  | O16-Eu1-O3  | 77.7(3)   |
| O20-Eu1-O21                                                     | 108.8(3) | O15-Eu1-N8  | 138.7(3)  |
| O16-Eu1-N8                                                      | 77.4(3)  | O15-Eu1-N3  | 79.0(3)   |
| O16-Eu1-N3                                                      | 138.7(3) | O15-Eu1-O21 | 65.0(3)   |
| O16-Eu1-O21                                                     | 68.7(3)  | O15-Eu1-O20 | 77.6 (3)  |
| O16-Eu1-O20                                                     | 132.4(3) | O15-Eu1-O9  | 138.3(3)  |
| O16-Eu1-O15                                                     | 131.4(3) | O16-Eu1-O9  | 76.3(3)   |

Symmetry code: <sup>1</sup>+X,+Y,-1+Z; <sup>2</sup>+X,+Y,1+Z.

**Table S8.** Selected bond distances (Å) and band angles (°) of **S-Eu-phen**.

|                                                                 |           |             |           |
|-----------------------------------------------------------------|-----------|-------------|-----------|
| Eu1-N2                                                          | 2.597(16) | Eu1-O10     | 2.372(11) |
| Eu1-O1                                                          | 2.393(13) | Eu1-O19     | 2.371(12) |
| Eu1-N3                                                          | 2.588(15) | Eu1-O25     | 2.408(11) |
| Eu1-O2                                                          | 2.961(13) | Eu1-O26     | 2.599(10) |
| Symmetry code: <sup>1</sup> +X,+Y,1+Z; <sup>2</sup> +X,+Y,-1+Z. |           |             |           |
| O1-Eu1-O2                                                       | 142.7(4)  | N2-Eu1-O26  | 106.0(4)  |
| O1-Eu1-N2                                                       | 139.0(4)  | O1-Eu1-N3   | 141.0(4)  |
| O1-Eu1-O2                                                       | 47.2(4)   | O1-Eu1-O25  | 75.0(4)   |
| O1-Eu1-O26                                                      | 69.3(4)   | N3-Eu1-N2   | 63.5(5)   |
| N3-Eu1-O2                                                       | 141.9(4)  | N3-Eu1-O26  | 73.7(4)   |
| O10-Eu1-N2                                                      | 139.1(4)  | O10-Eu1-O1  | 81.1(4)   |
| O10-Eu1-N3                                                      | 79.2(4)   | O10-Eu1-O2  | 64.8(4)   |
| O10-Eu1-O25                                                     | 137.8(4)  | O10-Eu1-O26 | 77.1(3)   |
| O19-Eu1-N2                                                      | 77.2(5)   | O19-Eu1-O1  | 77.9(4)   |
| O19-Eu1-N3                                                      | 138.9(4)  | O19-Eu1-O2  | 68.8(4)   |
| O19-Eu1-O10                                                     | 131.6(4)  | O19-Eu1-O25 | 76.4(4)   |
| O19-Eu1-O26                                                     | 132.0(4)  | O25-Eu1-N2  | 67.9(4)   |
| O25-Eu1-N3                                                      | 98.3(4)   | O25-Eu1-O2  | 116.4(4)  |
| O25-Eu1-O26                                                     | 62.1(3)   | O26-Eu1-O2  | 108.0(4)  |
| O36-Eu1-N2                                                      | 81.1(5)   | O36-Eu1-O1  | 123.9(4)  |
| O36-Eu1-N3                                                      | 84.6(5)   | O36-Eu1-O2  | 77.0(4)   |
| O36-Eu1-O10                                                     | 79.1(4)   | O36-Eu1-O19 | 77.5(4)   |

Symmetry code: <sup>1</sup>+X,+Y,-1+Z; <sup>2</sup>+X,+Y,1+Z.

**Table S9.** Selected bond distances (Å) and bond angles (°) of *R*-Tb-phen.

|                                                                 |           |                         |           |
|-----------------------------------------------------------------|-----------|-------------------------|-----------|
| Tb1-O1                                                          | 2.308(12) | Tb1-O4                  | 2.415(13) |
| Tb1-O2 <sup>1</sup>                                             | 2.427(13) | Tb1-O13                 | 2.358(14) |
| Tb1-O14                                                         | 2.361(13) | Tb1-N1                  | 2.575(18) |
| Tb1-O31                                                         | 2.364(14) | Tb1-N5                  | 2.565(17) |
| Symmetry code: <sup>1</sup> +X,+Y,1+Z; <sup>2</sup> +X,+Y,-1+Z. |           |                         |           |
| O1-Tb1-O2 <sup>1</sup>                                          | 88.5(4)   | O1-Tb1-O4               | 84.5(5)   |
| O1-Tb1-O13                                                      | 73.4(5)   | O1-Tb1-O14              | 72.5(5)   |
| O1-Tb1-N1                                                       | 146.7(5)  | O1-Tb1-O31              | 113.3(5)  |
| O1-Tb1-N5                                                       | 149.0(5)  | O2 <sup>1</sup> -Tb1-N1 | 69.0(5)   |
| O2 <sup>1</sup> -Tb1-N5                                         | 107.0(5)  | O4-Tb1-O2 <sup>1</sup>  | 72.9(4)   |
| O4-Tb1-N1                                                       | 110.2(5)  | O4-Tb1-N5               | 75.1(5)   |
| O13-Tb1-O2 <sup>1</sup>                                         | 144.2(5)  | O13-Tb1-O4              | 74.8(5)   |
| O13-Tb1-O14                                                     | 125.5(5)  | O13-Tb1-N1              | 138.3(5)  |
| O13-Tb1-O31                                                     | 78.8(5)   | O13-Tb1-N5              | 78.7(5)   |
| O14-Tb1-O2 <sup>1</sup>                                         | 74.8(4)   | O14-Tb1-O4              | 140.4(5)  |
| O14-Tb1-N1                                                      | 77.9(5)   | O14-Tb1-O31             | 77.4(5)   |
| O14-Tb1-N5                                                      | 136.9(5)  | O31-Tb1-O2 <sup>1</sup> | 137.0(5)  |
| O31-Tb1-O4                                                      | 142.1(5)  | O31-Tb1-N1              | 73.6(5)   |
| O31-Tb1-N5                                                      | 73.4(5)   | N5-Tb1-N1               | 63.9(6)   |
| O5-Tb2-O7                                                       | 124.3(5)  | O5-Tb2-O10              | 77.8(5)   |
| O5-Tb2-O12                                                      | 78.9(5)   | O5-Tb2-O16              | 142.1(5)  |
| O5-Tb2-O21                                                      | 150.0(5)  | O5-Tb2-N4               | 82.9(5)   |
| O5-Tb2-N8                                                       | 79.1(5)   | O7-Tb2-O16              | 75.6(5)   |

Symmetry code: <sup>1</sup>+X,+Y,1+Z; <sup>2</sup>+X,+Y,-1+Z.

**Table S10.** Selected bond distances (Å) and bond angles (°) of **S-Tb-phen**.

|                                                                 |           |                         |           |
|-----------------------------------------------------------------|-----------|-------------------------|-----------|
| Tb1-O6 <sup>1</sup>                                             | 2.425(17) | Tb1-O13                 | 2.385(18) |
| Tb1-O15                                                         | 2.417(17) | Tb1-O16                 | 2.391(16) |
| Tb1-O19                                                         | 2.340(17) | Tb1-O27                 | 2.321(17) |
| Tb1-N3                                                          | 2.59(2)   | Tb1-N5                  | 2.56(2)   |
| Symmetry code: <sup>1</sup> +X,+Y,-1+Z; <sup>2</sup> +X,+Y,1+Z. |           |                         |           |
| O6 <sup>1</sup> -Tb1-N3                                         | 105.1(6)  | O6 <sup>1</sup> -Tb1-N5 | 65.0(6)   |
| O13-Tb1-O6 <sup>1</sup>                                         | 73.7(6)   | O13-Tb1-O15             | 75.5(6)   |
| O13-Tb1-O16                                                     | 74.9(6)   | O13-Tb1-N3              | 71.5(6)   |
| O13-Tb1-N5                                                      | 105.7(6)  | O15-Tb1-O6 <sup>1</sup> | 76.9(6)   |
| O15-Tb1-N5                                                      | 139.1(7)  | O16-Tb1-O6 <sup>1</sup> | 145.1(5)  |
| O15-Tb1-N3                                                      | 144.6(7)  | O16-Tb1-O15             | 81.0(6)   |
| O16-Tb1-N3                                                      | 78.5(6)   | O16-Tb1-N5              | 139.6(6)  |
| O19-Tb1-O6 <sup>1</sup>                                         | 76.4(6)   | O19-Tb1-O13             | 145.8(6)  |
| O19-Tb1-O15                                                     | 82.0(6)   | O19-Tb1-O16             | 126.8(6)  |
| O19-Tb1-N3                                                      | 133.2(6)  | O19-Tb1-N5              | 75.4(6)   |
| O27-Tb1-O6 <sup>1</sup>                                         | 141.9(6)  | O27-Tb1-O13             | 139.9(6)  |
| O27-Tb1-O15                                                     | 121.4(6)  | O27-Tb1-O16             | 72.9(6)   |
| O27-Tb1-O19                                                     | 74.0(6)   | O27-Tb1-N3              | 79.2(6)   |
| O27-Tb1-N5                                                      | 84.6(6)   | N5-Tb1-N3               | 64.3(7)   |
| O1-Tb2-N6                                                       | 67.7(6)   | O1-Tb2-N8               | 106.3(6)  |
| O2-Tb2-O1                                                       | 90.3(5)   | O2-Tb2-O3               | 72.2(6)   |
| O2-Tb2-O12                                                      | 85.2(6)   | O2-Tb2-O32              | 73.1(6)   |

Symmetry code: <sup>1</sup>+X,+Y,-1+Z; <sup>2</sup>+X,+Y,1+Z.

**Table S11** The calculated value of CShM for Ln<sup>3+</sup> of *R/S*-Ln (Ln = Eu/Tb).

| Structure | <i>R</i> -Eu  | <i>S</i> -Eu  | <i>R</i> -Tb  | <i>S</i> -Tb  |
|-----------|---------------|---------------|---------------|---------------|
|           | Eu1           | Eu1           | Tb1           | Tb1           |
| OP-8      | 30.466        | 30.352        | 30.67         | 30.44         |
| HPY-8     | 26.7          | 26.755        | 26.896        | 26.933        |
| HBPY-8    | 28.922        | 28.963        | 29.169        | 29.237        |
| CU-8      | 28.735        | 28.770        | 28.931        | 29.049        |
| SAPR-8    | 24.461        | 24.384        | 24.711        | 24.595        |
| TDD-8     | 22.629        | 22.554        | 22.773        | 22.755        |
| JGBF-8    | 24.688        | 24.727        | 24.883        | 24.793        |
| JETBPY-8  | <b>13.252</b> | <b>13.219</b> | <b>13.314</b> | <b>13.344</b> |
| JBTPR-8   | 17.33         | 17.218        | 17.439        | 17.367        |
| BTPR-8    | 21.976        | 21.852        | 22.13         | 22.052        |
| JSD-8     | 17.46         | 17.398        | 17.647        | 17.501        |
| TT-8      | 29.214        | 29.272        | 29.452        | 29.553        |
| ETBPY-8   | 22.601        | 22.525        | 22.77         | 22.777        |

**Table S12** The calculated value of CShM for Ln<sup>3+</sup> of *R/S*-Ln-phen (Ln = Eu/Tb).

| Structure | <i>R</i> -Eu-phen |               |              |              | <i>S</i> -Eu-phen |              |               |              |
|-----------|-------------------|---------------|--------------|--------------|-------------------|--------------|---------------|--------------|
|           | Eu1               | Eu2           | Eu3          | Eu4          | Eu1               | Eu2          | Eu3           | Eu4          |
| EP-9      | 25.841            | 27.827        | 24.608       | 25.045       | 25.975            | 25.118       | 28.001        | 24.373       |
| OPY-9     | 16.273            | 17.538        | 15.127       | 17.683       | 16.327            | 17.559       | 17.414        | 15.229       |
| HBPY-9    | 20.4              | 19.238        | 20.319       | 22.958       | 20.588            | 22.644       | 18.94         | 20.321       |
| JTC-9     | 21.847            | 21.874        | 16.965       | 17.275       | 21.962            | 17.086       | 21.721        | 16.651       |
| JCCU-9    | 14.966            | 15.225        | 16.123       | 16.794       | 14.96             | 17.085       | 15.319        | 16.2922      |
| CCU-9     | 17.879            | 18.092        | 15.776       | 17.171       | 17.924            | 17.316       | 18.158        | 16.011       |
| JCSAPR-9  | <b>10.883</b>     | <b>10.855</b> | 10.138       | 9.031        | <b>10.944</b>     | 9.158        | <b>10.762</b> | 10.432       |
| CSAPR-9   | 13.089            | 13.038        | 9.747        | 9.351        | 13.2              | 9.344        | 12.924        | 9.953        |
| JTCTPR-9  | 12.297            | 12.472        | 11.535       | 9.558        | 12.288            | 9.757        | 12.364        | 11.808       |
| TCTPR-9   | 14.379            | 14.466        | 10.554       | 10.41        | 14.475            | 10.415       | 14.403        | 10.801       |
| JTDIC-9   | 20.166            | 20.487        | 18.067       | 18.27        | 20.143            | 18.432       | 20.524        | 18.034       |
| HH-9      | 18.03             | 17.101        | 14.417       | 15.634       | 18.207            | 15.671       | 16.915        | 14.521       |
| MFF-9     | 12.217            | 11.95         | <b>8.807</b> | <b>8.537</b> | 12.31             | <b>8.539</b> | 11.81         | <b>9.024</b> |

  

| Structure | <i>R</i> -Tb-phen |               |        |               | <i>S</i> -Tb-phen |        |               |        |
|-----------|-------------------|---------------|--------|---------------|-------------------|--------|---------------|--------|
|           | Tb1               | Tb2           | Tb3    | Tb4           | Tb1               | Tb2    | Tb3           | Tb4    |
| EP-9      | 25.365            | 26.049        | 24.603 | 27.73         | 27.636            | 25.096 | 26.02         | 24.775 |
| OPY-9     | 17.869            | 16.731        | 15.036 | 17.932        | 18.464            | 18.096 | 16.767        | 15.143 |
| HBPY-9    | 22.907            | 20.879        | 19.671 | 19.672        | 19.959            | 23.188 | 20.88         | 20.091 |
| JTC-9     | 17.538            | 22.269        | 16.811 | 22.085        | 22.065            | 17.27  | 22.405        | 17.025 |
| JCCU-9    | 16.233            | 15.068        | 15.94  | 15.637        | 15.452            | 16.136 | 15.238        | 15.851 |
| CCU-9     | 17.095            | 18.217        | 15.703 | 18.779        | 18.62             | 16.901 | 18.353        | 15.601 |
| JCSAPR-9  | 8.536             | <b>11.149</b> | 9.584  | <b>11.273</b> | <b>11.325</b>     | 8.692  | <b>11.281</b> | 9.752  |
| CSAPR-9   | 9.292             | 13.592        | 9.273  | 13.718        | 13.787            | 9.368  | 13.699        | 9.407  |

|          |              |        |              |         |        |             |        |              |
|----------|--------------|--------|--------------|---------|--------|-------------|--------|--------------|
| JTCTPR-9 | 9.137        | 12.564 | 11.131       | 12.846  | 12.809 | 9.218       | 12.736 | 11.266       |
| TCTPR-9  | 10.371       | 14.875 | 9.928        | 15.2208 | 15.378 | 10.489      | 14.969 | 10.102       |
| JTDIC-9  | 18.341       | 20.065 | 18.326       | 20.763  | 20.888 | 18.198      | 20.127 | 18.25        |
| HH-9     | 15.747       | 18.394 | 14.311       | 17.785  | 17.959 | 15.544      | 18.402 | 14.331       |
| MF-9     | <b>8.534</b> | 12.74  | <b>8.378</b> | 12.617  | 12.642 | <b>8.56</b> | 14.331 | <b>8.473</b> |

---



**Table S13** The  $g_{lum}$  values of ***R/S*-Eu** and ***R/S*-Eu-phen**.

| Structure               | ${}^5D_0 \rightarrow {}^7F_1$ | ${}^5D_0 \rightarrow {}^7F_2$ | ${}^5D_0 \rightarrow {}^7F_3$ | ${}^5D_0 \rightarrow {}^7F_4$ |
|-------------------------|-------------------------------|-------------------------------|-------------------------------|-------------------------------|
| <b><i>R</i>-Eu</b>      | $-7.3 \times 10^{-4}$         | 0.0011                        | 0.0061                        | -0.0039                       |
| <b><i>S</i>-Eu</b>      | $7.3 \times 10^{-4}$          | -0.0010                       | -0.0060                       | 0.0053                        |
| <b><i>R</i>-Eu-phen</b> | -0.0036                       | -0.0017                       | 0.0010                        | $7.4 \times 10^{-4}$          |
| <b><i>S</i>-Eu-phen</b> | 0.0040                        | 0.0018                        | -0.0056                       | -0.0012                       |

**Table S14** The  $g_{lum}$  values of ***R/S*-Tb** and ***R/S*-Tb-phen**.

| Structure               | ${}^5D_4 \rightarrow {}^7F_6$ | ${}^5D_4 \rightarrow {}^7F_5$ | ${}^5D_4 \rightarrow {}^7F_4$ | ${}^5D_4 \rightarrow {}^7F_3$ |
|-------------------------|-------------------------------|-------------------------------|-------------------------------|-------------------------------|
| <b><i>R</i>-Tb</b>      | 0.0012                        | $-9.7 \times 10^{-4}$         | 0.0031                        | -0.0011                       |
| <b><i>S</i>-Tb</b>      | -0.0017                       | $9.7 \times 10^{-4}$          | -0.0013                       | -0.0011                       |
| <b><i>R</i>-Tb-phen</b> | $-4.1 \times 10^{-4}$         | 0.0012                        | $3.1 \times 10^{-4}$          | $-2.3 \times 10^{-4}$         |
| <b><i>S</i>-Tb-phen</b> | $2.2 \times 10^{-4}$          | -0.0012                       | $-4.8 \times 10^{-4}$         | $2.3 \times 10^{-4}$          |

## References

- 1 L. J. Bourhis, O. V. Dolomanov, R. J. Gildea, J. A. K. Howard, and H. Puschmann, The anatomy of a comprehensive constrained, restrained refinement program for the modern computing environment - Olex2 dissected, *Acta Crystallogr., Sect. A: Cryst. Phys., Diffr., Theor. Gen. Crystallogr.*, 2015, **71**, 59.
- 2 H. Zhao and P. Schuck, Combining biophysical methods for the analysis of protein complex stoichiometry and affinity in SEDPHAT, *Acta Crystallogr., Sect. D: Biol. Crystallogr.*, 2015, **71**, 3.
- 3 P. Raithby, Acta Crystallographica Section C: Chemistry Matters, *Acta Crystallogr., Sect. C: Cryst. Struct. Commun.*, 2023, **79**, 25.
